# Supplementary material for: A multifunctional metal-biopolymer coordinated double network hydrogel combined with multi-stimulus responsiveness, self-healing, shape memory and antibacterial properties
Source: Royal Society of Chemistry journal article supplement (doi:10.1039/d0bm00425a), 2020-01-01
Supplement: d0bm00425a1.pdf [file d0bm00425a1.pdf]

## Supporting Information for

### Multifunctional metal-biopolymer coordinated double network hydrogel combining of multi-stimuli responsiveness, self-healing, shape memory and antibacterial properties

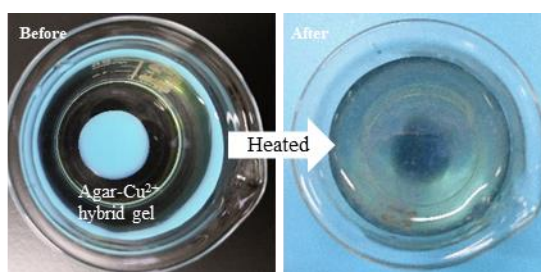

**Fig. S1** Optical images illustrate the Agar-Cu<sup>2+</sup> hybrid gel was completely dissolved after being heated at 85 °C for 5 min in water solution.

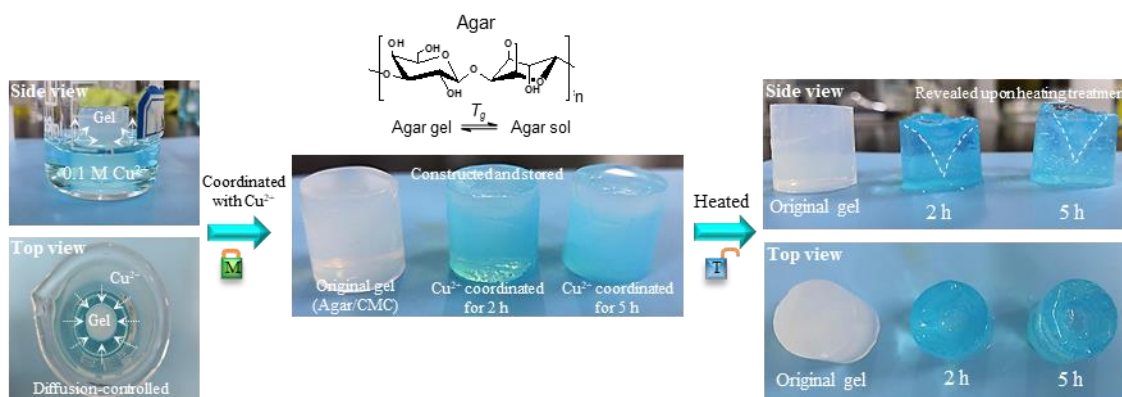

**Fig. S2** The Agar/CMC-Cu<sup>2+</sup> DN gels with different irregular/pre-designed 3D shapes were constructed and stored in a bulk Agar gel matrix by using a diffusion-controlled approach and then revealed by heated at 85 °C for 5 min.

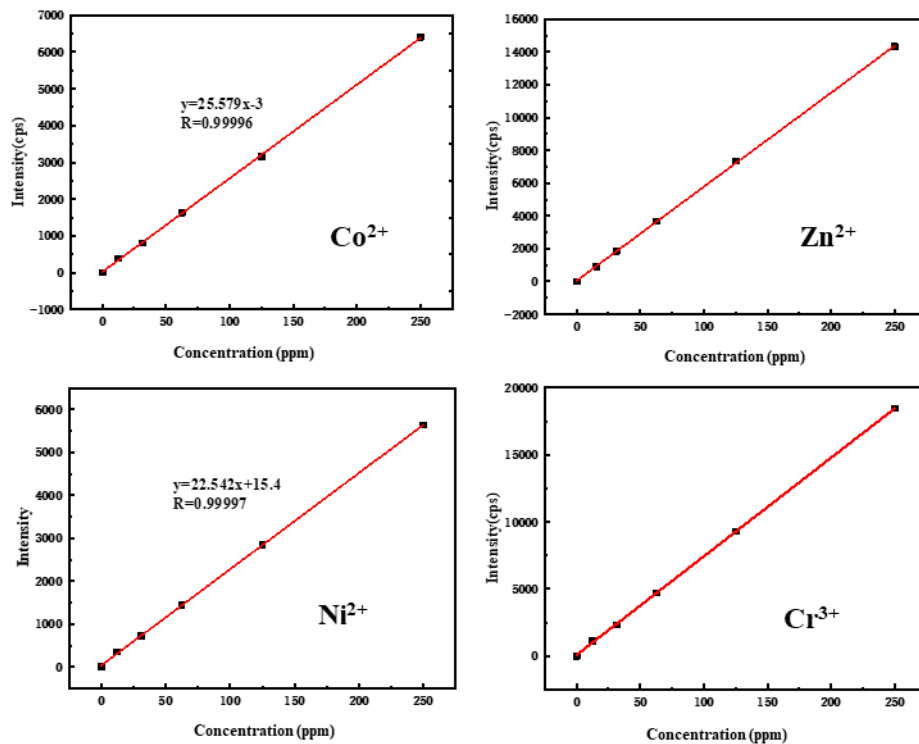

**Fig. S3** Calibration curves of different metal ions show the linearly correlations between the intensities and concentrations.

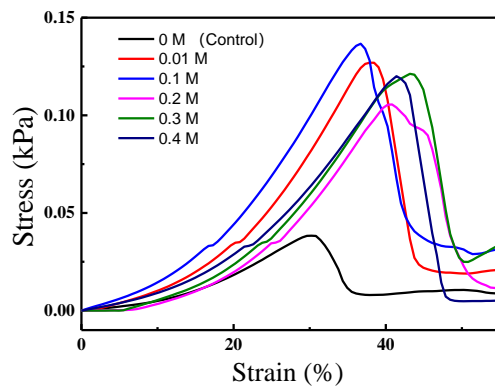

**Fig. S4** Mechanical properties of the CMC/Agar hydrogels immersed in a solution containing of varied concentrations of Cu<sup>2+</sup> for 12 hours.

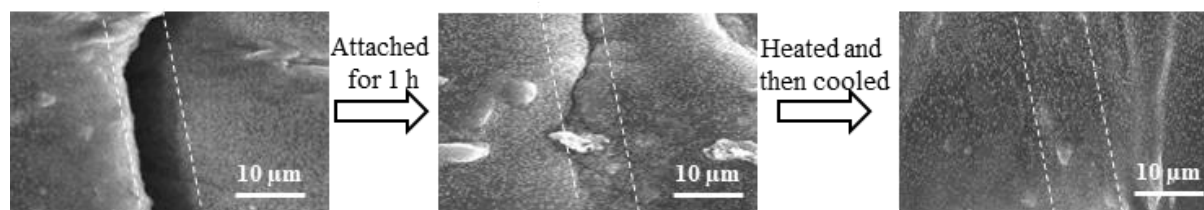

**Fig. S5** Topography observations of the copper ions coordinated hybrid DN gels at different stage revealing the multi-staged self-healing behavior after reprogrammed the agar gel medium at 85 °C for 5 min.
